# Supplementary material
Source: PubMed Central journal article supplement (PMC6909708)
Supplement: Supp_Fig1.pdf [file Supp_Fig1.pdf]

## Supplementary Data

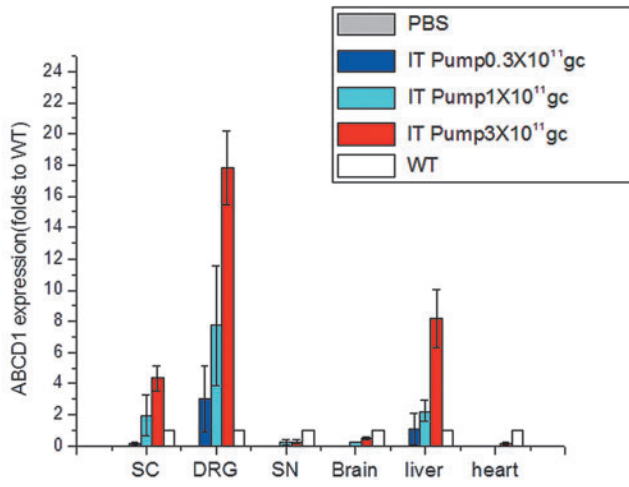

**Supplementary Figure S1.** Distribution of ABCD1 protein after intrathecal pump delivery of rAAV9-CBA-h*ABCD1* at various doses.

---
