# Supplementary material
Source: PubMed Central journal article supplement (PMC6909708)
Supplement: Supp_Fig2.pdf [file Supp_Fig2.pdf]

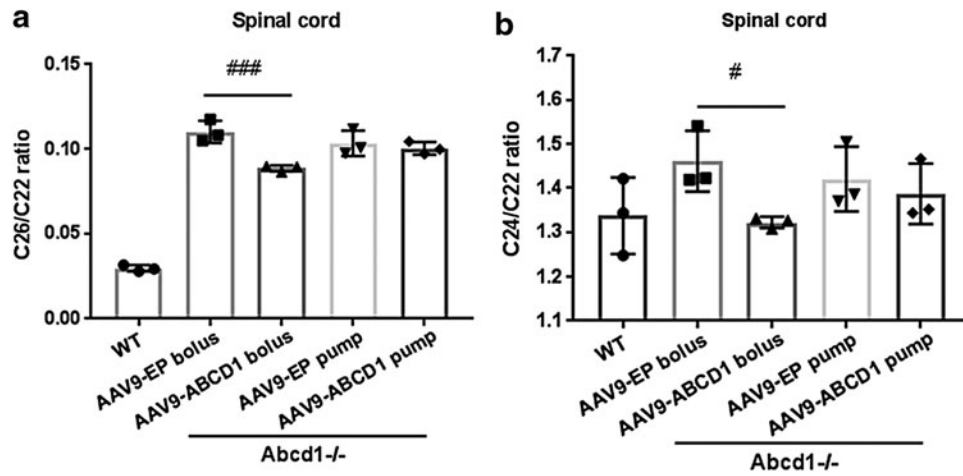

**Supplementary Figure S2.** Intrathecal injection of rAAV9-CBA-hABCD1 leads to partial biochemical correction in *Abcd1*<sup>-/-</sup> mouse spinal cord as compared with rAAV9-CBA-Empty vector injection. **(a)** C26/C22 ratio change in spinal cord. **(b)** C24/C22 ratio change in spinal cord. Data are expressed as means ± SEM. # *p* < 0.05, ### *p* < 0.001 compared between marked groups.
