# Supplementary material
Source: PubMed Central journal article supplement (PMC6909708)
Supplement: Supp_Fig3.pdf [file Supp_Fig3.pdf]

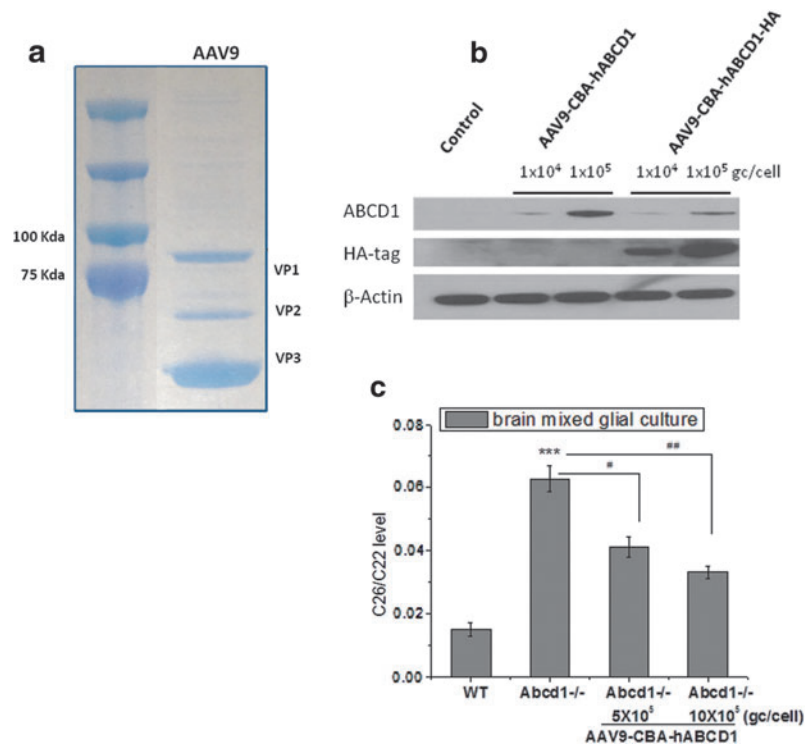

**Supplementary Figure S3.** *In vitro* validation of rAAV9 vector purity and rAAV9-CBA-hABCD1 vector functionality. **(a)** Purity of representative AAV9 vector assessed by Coomassie staining. **(b)** ABCD1 expression in HEK-293 cells after transduction with rAAV9-CBA-hABCD1 and rAAV9-CBA-hABCD1-HA, by Western blot. **(c)** rAAV9-CBA-hABCD1 transduction of brain mixed glial cells from *ABCD1*<sup>-/-</sup> mice leads to biochemical correction *in vitro*. Data are expressed as means ± SEM. \*\*\**p* < 0.001 as compared with WT; #*p* < 0.05, ##*p* < 0.01 compared between marked groups.
